# Supplementary material for: Pre-concentration by liquid intake by paper (P-CLIP): a new technique for large volumes and digital microfluidics
Source: Royal Society of Chemistry journal article supplement (doi:10.1039/c7lc00440k), 2017-01-01
Supplement: c7lc00440k1.pdf [file c7lc00440k1.pdf]

**Supplementary Information for**

**Pre-Concentration by Liquid Intake by Paper (P-CLIP): A New Technique for Large Volumes  
and Digital Microfluidics**

Darius G. Rackus<sup>1,2</sup>, Richard P.S. de Campos,<sup>1,2</sup> Calvin Chan<sup>1</sup>, Maria M. Karcz<sup>1,2</sup>, Brendon  
Seale<sup>1</sup>, Tanya Narahari<sup>1,2</sup>, Christopher Dixon<sup>1</sup>, M. Dean Chamberlain<sup>1,2</sup>, and Aaron R.  
Wheeler<sup>1,2,3†</sup>

<sup>1</sup> Department of Chemistry, University of Toronto, 80 St George St., Toronto, ON, M5S 3H6,  
Canada

<sup>2</sup> Donnelly Centre for Cellular and Biomolecular Research, 160 College St., Toronto, ON, M5S  
3E1, Canada

<sup>3</sup> Institute of Biomaterials and Biomedical Engineering, University of Toronto, 164 College St.,  
Toronto, ON, M5S 3G9, Canada

† Corresponding Author  
email: [aaron.wheeler@utoronto.ca](mailto:aaron.wheeler@utoronto.ca)  
tel: (416) 946 3864  
fax: (416) 946 3865

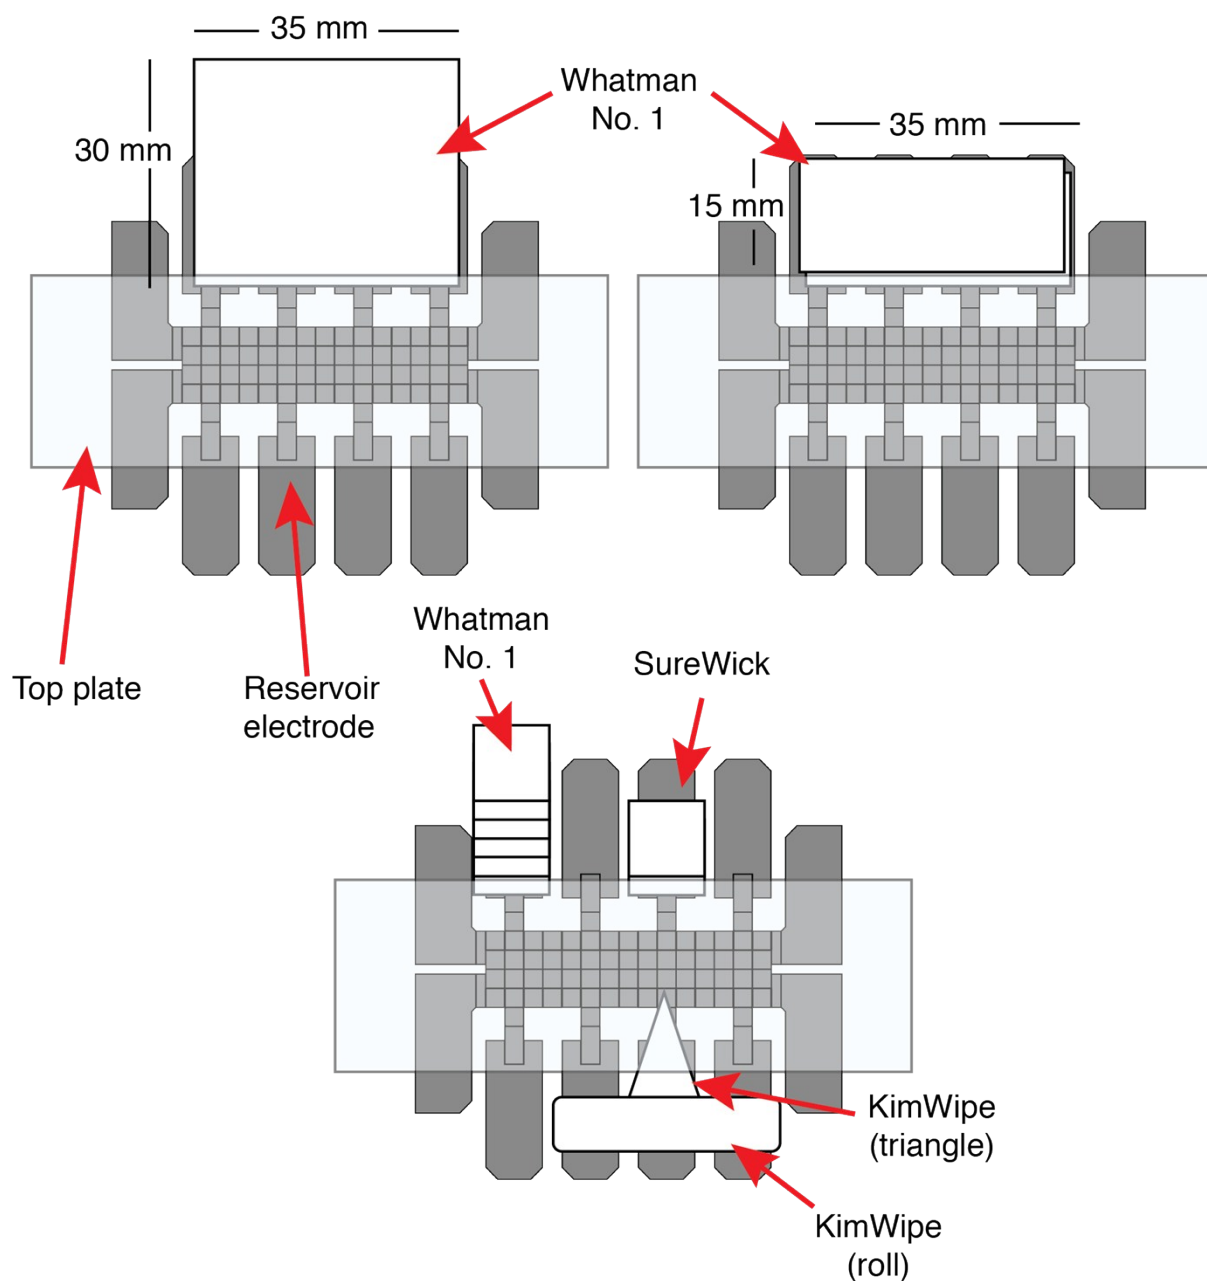

**Figure S1.** Cartoon illustrating the various wick formats that were tested for P-CLIP performance. The large Whatman No. 1 wicks (top) were inserted over a group of reservoir electrodes between the top and bottom plates of the DMF device by the long edge. The smaller wicks (bottom) comprised multiple layers and the bottom wick was inserted between the top and bottom plates of the DMF device.
